# Supplementary material for: New O- and N-N-Bridging Complexes of Tc(V), the Role of the Nitrogen Atom Position in Aromatic Rings: Reaction Mechanism, Spectroscopy, DTA, XRD and Hirshfeld Surface Analysis
Source: MDPI journal article supplement (doi:10.3390/ijms232214034), 2022-11-14
Supplement: s1 [file s1]

# New O- and N-N-bridging complexes of Tc(V), the role of the position of the nitrogen atom in aromatic rings: reaction mechanism, spectroscopy, XRD and Hirshfeld surface analysis

Anton Petrovich Novikov\*, Mikhail Alexandrovich Volkov

Frumkin Institute of Physical Chemistry and Electrochemistry, Russian Academy of Sciences, Leninskii prospect 31-4, 119071 Moscow, Russia

\* Correspondence: [tony.novickoff@yandex.ru](mailto:tony.novickoff@yandex.ru)

**Table S1.** Bond Lengths for **1**.

| Atom | Atom | Length/Å  |  | Atom | Atom | Length/Å |
|------|------|-----------|--|------|------|----------|
| Tc1  | Cl2  | 2.336(6)  |  | N3   | N4   | 1.33(3)  |
| Tc1  | Cl1  | 2.330(7)  |  | N3   | C8   | 1.32(3)  |
| Tc1  | O2   | 1.646(18) |  | N4   | C5   | 1.32(3)  |
| Tc1  | N4   | 2.19(2)   |  | C6   | C7   | 1.41(3)  |
| Tc1  | O3   | 1.915(17) |  | C6   | C5   | 1.45(3)  |
| Tc1  | N2   | 2.17(2)   |  | C8   | C7   | 1.37(3)  |
| Tc2  | Cl3  | 2.337(6)  |  | C2   | C3   | 1.36(3)  |
| Tc2  | Cl4  | 2.339(6)  |  | C2   | C1   | 1.37(3)  |
| Tc2  | N3   | 2.19(2)   |  | N1   | N2   | 1.40(3)  |
| Tc2  | O1   | 1.668(17) |  | N1   | C4   | 1.35(3)  |
| Tc2  | O3   | 1.877(17) |  | C3   | C4   | 1.38(3)  |
| Tc2  | N1   | 2.15(2)   |  | N2   | C1   | 1.31(3)  |

**Table S2.** Bond Angles for **1**.

| Atom | Atom | Atom | Angle/°  |  | Atom | Atom | Atom | Angle/°   |
|------|------|------|----------|--|------|------|------|-----------|
| Cl1  | Tc1  | Cl2  | 91.7(2)  |  | O3   | Tc2  | N1   | 77.9(8)   |
| O2   | Tc1  | Cl2  | 100.1(7) |  | N1   | Tc2  | Cl3  | 171.4(7)  |
| O2   | Tc1  | Cl1  | 100.3(7) |  | N1   | Tc2  | Cl4  | 90.3(6)   |
| O2   | Tc1  | N4   | 85.0(8)  |  | N1   | Tc2  | N3   | 90.0(8)   |
| O2   | Tc1  | O3   | 157.5(7) |  | N4   | N3   | Tc2  | 118.3(17) |
| O2   | Tc1  | N2   | 86.3(8)  |  | C8   | N3   | Tc2  | 120.8(17) |
| N4   | Tc1  | Cl2  | 174.1(5) |  | C8   | N3   | N4   | 121(2)    |
| N4   | Tc1  | Cl1  | 90.4(6)  |  | N3   | N4   | Tc1  | 118.3(16) |
| O3   | Tc1  | Cl2  | 95.3(5)  |  | C5   | N4   | Tc1  | 120.6(16) |
| O3   | Tc1  | Cl1  | 95.5(5)  |  | C5   | N4   | N3   | 121(2)    |

|     |     |     |          |  |     |    |     |           |
|-----|-----|-----|----------|--|-----|----|-----|-----------|
| O3  | Tc1 | N4  | 79.1(7)  |  | Tc2 | O3 | Tc1 | 128.1(7)  |
| O3  | Tc1 | N2  | 78.0(8)  |  | C7  | C6 | C5  | 112(2)    |
| N2  | Tc1 | Cl2 | 87.4(6)  |  | N3  | C8 | C7  | 121(2)    |
| N2  | Tc1 | Cl1 | 173.4(6) |  | C8  | C7 | C6  | 122(2)    |
| N2  | Tc1 | N4  | 89.9(8)  |  | C3  | C2 | C1  | 118(2)    |
| Cl3 | Tc2 | Cl4 | 91.9(2)  |  | N2  | N1 | Tc2 | 118.1(15) |
| N3  | Tc2 | Cl3 | 86.9(6)  |  | C4  | N1 | Tc2 | 124.7(18) |
| N3  | Tc2 | Cl4 | 174.2(6) |  | C4  | N1 | N2  | 117(2)    |
| O1  | Tc2 | Cl3 | 101.8(7) |  | N4  | C5 | C6  | 123(2)    |
| O1  | Tc2 | Cl4 | 99.8(7)  |  | C2  | C3 | C4  | 118(2)    |
| O1  | Tc2 | N3  | 86.0(9)  |  | N1  | N2 | Tc1 | 117.3(15) |
| O1  | Tc2 | O3  | 158.8(8) |  | C1  | N2 | Tc1 | 123.6(18) |
| O1  | Tc2 | N1  | 86.0(9)  |  | C1  | N2 | N1  | 119(2)    |
| O3  | Tc2 | Cl3 | 93.6(5)  |  | N1  | C4 | C3  | 124(2)    |
| O3  | Tc2 | Cl4 | 94.1(5)  |  | N2  | C1 | C2  | 124(2)    |
| O3  | Tc2 | N3  | 80.3(7)  |  |     |    |     |           |

**Table S3.** Torsion Angles for **1**.

| <b>A</b> | <b>B</b> | <b>C</b> | <b>D</b> | <b>Angle/°</b> |  | <b>A</b> | <b>B</b> | <b>C</b> | <b>D</b> | <b>Angle/°</b> |
|----------|----------|----------|----------|----------------|--|----------|----------|----------|----------|----------------|
| Tc1      | N4       | C5       | C6       | 175.2(16)      |  | N4       | N3       | C8       | C7       | -1(3)          |
| Tc1      | N2       | C1       | C2       | 175.1(18)      |  | C8       | N3       | N4       | Tc1      | -175.3(16)     |
| Tc2      | N3       | N4       | Tc1      | 6(2)           |  | C8       | N3       | N4       | C5       | 2(3)           |
| Tc2      | N3       | N4       | C5       | -175.9(17)     |  | C7       | C6       | C5       | N4       | 1(3)           |
| Tc2      | N3       | C8       | C7       | 176.9(16)      |  | C2       | C3       | C4       | N1       | -5(4)          |
| Tc2      | N1       | N2       | Tc1      | 6(2)           |  | N1       | Tc2      | O3       | Tc1      | 50.3(12)       |
| Tc2      | N1       | N2       | C1       | -176.8(17)     |  | N1       | N2       | C1       | C2       | -2(4)          |
| Tc2      | N1       | C4       | C3       | -179.7(17)     |  | C5       | C6       | C7       | C8       | 0(3)           |
| Cl3      | Tc2      | O3       | Tc1      | -128.1(11)     |  | C3       | C2       | C1       | N2       | 0(4)           |
| Cl4      | Tc2      | O3       | Tc1      | 139.7(11)      |  | N2       | N1       | C4       | C3       | 4(4)           |
| N3       | Tc2      | O3       | Tc1      | -41.8(12)      |  | C4       | N1       | N2       | Tc1      | -177.1(17)     |
| N3       | N4       | C5       | C6       | -2(3)          |  | C4       | N1       | N2       | C1       | 0(3)           |
| N3       | C8       | C7       | C6       | 0(3)           |  | C1       | C2       | C3       | C4       | 3(3)           |
| O1       | Tc2      | O3       | Tc1      | 9(3)           |  |          |          |          |          |                |

**Table S4.** Bond Lengths for **2**.

| <b>Atom</b> | <b>Atom</b> | <b>Length/Å</b> |  | <b>Atom</b> | <b>Atom</b> | <b>Length/Å</b> |
|-------------|-------------|-----------------|--|-------------|-------------|-----------------|
| Tc1         | Cl1         | 2.3447(10)      |  | N12         | N11         | 1.365(5)        |
| Tc1         | Cl2         | 2.3435(11)      |  | N12         | C13         | 1.297(6)        |

|     |     |            |  |     |     |          |
|-----|-----|------------|--|-----|-----|----------|
| Tc1 | O1  | 1.916(3)   |  | N9  | C8  | 1.337(5) |
| Tc1 | O3  | 1.669(3)   |  | N9  | C10 | 1.343(5) |
| Tc1 | N1  | 2.162(3)   |  | N14 | C15 | 1.344(6) |
| Tc1 | N6  | 2.146(3)   |  | N14 | C13 | 1.321(6) |
| Tc2 | Cl3 | 2.3292(10) |  | N7  | N6  | 1.368(4) |
| Tc2 | Cl4 | 2.3375(11) |  | N7  | C8  | 1.308(5) |
| Tc2 | O1  | 1.937(2)   |  | N2  | N1  | 1.375(4) |
| Tc2 | O2  | 1.660(3)   |  | N2  | C3  | 1.318(5) |
| Tc2 | N7  | 2.153(3)   |  | N1  | C5  | 1.300(5) |
| Tc2 | N2  | 2.138(3)   |  | N6  | C10 | 1.303(5) |
| N4  | C3  | 1.334(5)   |  | N11 | C15 | 1.300(6) |
| N4  | C5  | 1.351(5)   |  |     |     |          |

**Table S5.** Bond Angles for **2**.

| Atom | Atom | Atom | Angle/°    |  | Atom | Atom | Atom | Angle/°    |
|------|------|------|------------|--|------|------|------|------------|
| Cl2  | Tc1  | Cl1  | 91.32(4)   |  | N2   | Tc2  | Cl3  | 88.78(9)   |
| O1   | Tc1  | Cl1  | 92.59(8)   |  | N2   | Tc2  | Cl4  | 170.59(9)  |
| O1   | Tc1  | Cl2  | 91.78(8)   |  | N2   | Tc2  | N7   | 87.23(12)  |
| O1   | Tc1  | N1   | 78.08(11)  |  | Tc1  | O1   | Tc2  | 128.89(13) |
| O1   | Tc1  | N6   | 78.52(11)  |  | C3   | N4   | C5   | 106.9(3)   |
| O3   | Tc1  | Cl1  | 101.06(10) |  | C13  | N12  | N11  | 111.2(4)   |
| O3   | Tc1  | Cl2  | 102.06(10) |  | C8   | N9   | C10  | 106.7(3)   |
| O3   | Tc1  | O1   | 160.22(11) |  | C13  | N14  | C15  | 106.2(4)   |
| O3   | Tc1  | N1   | 87.38(13)  |  | N6   | N7   | Tc2  | 119.6(2)   |
| O3   | Tc1  | N6   | 87.15(13)  |  | C8   | N7   | Tc2  | 132.8(3)   |
| N1   | Tc1  | Cl1  | 90.83(9)   |  | C8   | N7   | N6   | 107.1(3)   |
| N1   | Tc1  | Cl2  | 169.72(9)  |  | N1   | N2   | Tc2  | 120.0(2)   |
| N6   | Tc1  | Cl1  | 170.93(9)  |  | C3   | N2   | Tc2  | 132.9(3)   |
| N6   | Tc1  | Cl2  | 90.70(9)   |  | C3   | N2   | N1   | 107.1(3)   |
| N6   | Tc1  | N1   | 85.67(12)  |  | N2   | N1   | Tc1  | 118.5(2)   |
| Cl3  | Tc2  | Cl4  | 90.05(4)   |  | C5   | N1   | Tc1  | 133.8(3)   |
| O1   | Tc2  | Cl3  | 91.01(8)   |  | C5   | N1   | N2   | 107.7(3)   |
| O1   | Tc2  | Cl4  | 92.97(8)   |  | N7   | N6   | Tc1  | 119.0(2)   |
| O1   | Tc2  | N7   | 77.45(11)  |  | C10  | N6   | Tc1  | 133.1(3)   |
| O1   | Tc2  | N2   | 77.72(11)  |  | C10  | N6   | N7   | 107.8(3)   |
| O2   | Tc2  | Cl3  | 103.72(10) |  | C15  | N11  | N12  | 103.1(4)   |
| O2   | Tc2  | Cl4  | 101.31(11) |  | N11  | C15  | N14  | 111.9(4)   |
| O2   | Tc2  | O1   | 159.33(12) |  | N2   | C3   | N4   | 109.1(4)   |
| O2   | Tc2  | N7   | 87.07(13)  |  | N7   | C8   | N9   | 109.4(4)   |
| O2   | Tc2  | N2   | 88.04(13)  |  | N12  | C13  | N14  | 107.6(4)   |
| N7   | Tc2  | Cl3  | 168.36(8)  |  | N1   | C5   | N4   | 109.1(4)   |

|    |     |     |          |  |    |     |    |          |
|----|-----|-----|----------|--|----|-----|----|----------|
| N7 | Tc2 | Cl4 | 92.10(9) |  | N6 | C10 | N9 | 109.0(4) |
|----|-----|-----|----------|--|----|-----|----|----------|

**Table S6.** Hydrogen Bonds for **2**.

| D   | H   | A                | d(D-H)/Å | d(H-A)/Å | d(D-A)/Å | D-H-A/° |
|-----|-----|------------------|----------|----------|----------|---------|
| C13 | H13 | Cl3 <sup>1</sup> | 0.95     | 2.72     | 3.395(5) | 128.5   |
| C10 | H10 | Cl5 <sup>2</sup> | 0.95     | 2.76     | 3.384(4) | 124.2   |
| N14 | H14 | O1 <sup>1</sup>  | 0.82(4)  | 2.01(4)  | 2.781(4) | 157(4)  |
| N9  | H9  | Cl5              | 0.77(4)  | 2.34(4)  | 3.100(4) | 173(4)  |

<sup>1</sup>-X,1-Y,1-Z; <sup>2</sup>-1/2-X,-1/2+Y,1/2-Z

**Table S7.** Torsion Angles for **2**.

| A   | B   | C   | D   | Angle/°   |  | A   | B   | C   | D   | Angle/°  |
|-----|-----|-----|-----|-----------|--|-----|-----|-----|-----|----------|
| Tc1 | N1  | C5  | N4  | 179.9(3)  |  | N11 | N12 | C13 | N14 | 0.1(6)   |
| Tc1 | N6  | C10 | N9  | -175.5(3) |  | C15 | N14 | C13 | N12 | -0.5(6)  |
| Tc2 | N7  | N6  | Tc1 | 3.5(4)    |  | C3  | N4  | C5  | N1  | -0.4(4)  |
| Tc2 | N7  | N6  | C10 | -172.8(3) |  | C3  | N2  | N1  | Tc1 | 179.9(2) |
| Tc2 | N7  | C8  | N9  | 171.4(3)  |  | C3  | N2  | N1  | C5  | -0.8(4)  |
| Tc2 | N2  | N1  | Tc1 | -2.4(3)   |  | C8  | N9  | C10 | N6  | -0.2(5)  |
| Tc2 | N2  | N1  | C5  | 176.9(2)  |  | C8  | N7  | N6  | Tc1 | 176.4(3) |
| Tc2 | N2  | C3  | N4  | -176.8(3) |  | C8  | N7  | N6  | C10 | 0.0(4)   |
| N12 | N11 | C15 | N14 | -0.7(5)   |  | C13 | N12 | N11 | C15 | 0.4(5)   |
| N7  | N6  | C10 | N9  | 0.1(4)    |  | C13 | N14 | C15 | N11 | 0.8(6)   |
| N2  | N1  | C5  | N4  | 0.7(4)    |  | C5  | N4  | C3  | N2  | -0.1(5)  |
| N1  | N2  | C3  | N4  | 0.5(4)    |  | C10 | N9  | C8  | N7  | 0.2(5)   |
| N6  | N7  | C8  | N9  | -0.1(4)   |  |     |     |     |     |          |

**Table S8.** Bond Lengths for **3**.

| Atom | Atom             | Length/Å  |  | Atom | Atom | Length/Å |
|------|------------------|-----------|--|------|------|----------|
| Tc1  | O1               | 1.69(4)   |  | Tc2  | O3   | 1.62(4)  |
| Tc1  | N1 <sup>1</sup>  | 2.114(16) |  | Tc2  | O2   | 1.95(7)  |
| Tc1  | N1 <sup>2</sup>  | 2.114(16) |  | C3   | C4   | 1.48(4)  |
| Tc1  | N1 <sup>3</sup>  | 2.114(16) |  | C3   | N2   | 1.31(3)  |
| Tc1  | N1               | 2.114(16) |  | C3   | C2   | 1.40(4)  |
| Tc1  | O2               | 1.90(7)   |  | N1   | N2   | 1.37(3)  |
| Tc2  | Cl1 <sup>2</sup> | 2.397(5)  |  | N1   | C1   | 1.35(3)  |

|     |                  |          |  |    |    |         |
|-----|------------------|----------|--|----|----|---------|
| Tc2 | Cl1 <sup>3</sup> | 2.397(5) |  | C2 | C1 | 1.41(3) |
| Tc2 | Cl1              | 2.397(5) |  | C1 | C5 | 1.47(4) |
| Tc2 | Cl1 <sup>1</sup> | 2.397(5) |  |    |    |         |

<sup>1</sup>1-Y,+X,+Z; <sup>2</sup>1-X,1-Y,+Z; <sup>3</sup>+Y,1-X,+Z

**Table S9.** Bond Angles for **3**.

| Atom             | Atom | Atom             | Angle/°   |  | Atom | Atom | Atom             | Angle/°     |
|------------------|------|------------------|-----------|--|------|------|------------------|-------------|
| O1               | Tc1  | N1 <sup>1</sup>  | 92.7(7)   |  | O3   | Tc2  | Cl1 <sup>3</sup> | 94.8(2)     |
| O1               | Tc1  | N1 <sup>2</sup>  | 92.7(7)   |  | O3   | Tc2  | Cl1              | 94.8(2)     |
| O1               | Tc1  | N1               | 92.7(7)   |  | O3   | Tc2  | Cl1 <sup>1</sup> | 94.8(2)     |
| O1               | Tc1  | N1 <sup>3</sup>  | 92.7(7)   |  | O3   | Tc2  | Cl1 <sup>2</sup> | 94.8(2)     |
| O1               | Tc1  | O2               | 180.00(2) |  | O3   | Tc2  | O2               | 180.000(13) |
| N1 <sup>2</sup>  | Tc1  | N1 <sup>3</sup>  | 174.5(14) |  | O2   | Tc2  | Cl1 <sup>2</sup> | 85.2(2)     |
| N1 <sup>1</sup>  | Tc1  | N1 <sup>3</sup>  | 89.87(7)  |  | O2   | Tc2  | Cl1              | 85.2(2)     |
| N1 <sup>2</sup>  | Tc1  | N1               | 89.87(7)  |  | O2   | Tc2  | Cl1 <sup>3</sup> | 85.2(2)     |
| N1 <sup>1</sup>  | Tc1  | N1               | 174.5(14) |  | O2   | Tc2  | Cl1 <sup>1</sup> | 85.2(2)     |
| N1 <sup>1</sup>  | Tc1  | N1 <sup>2</sup>  | 89.87(7)  |  | N2   | C3   | C4               | 123(2)      |
| N1               | Tc1  | N1 <sup>3</sup>  | 89.87(7)  |  | N2   | C3   | C2               | 107(2)      |
| O2               | Tc1  | N1 <sup>3</sup>  | 87.3(7)   |  | C2   | C3   | C4               | 130(2)      |
| O2               | Tc1  | N1 <sup>1</sup>  | 87.3(7)   |  | N2   | N1   | Tc1              | 120.3(16)   |
| O2               | Tc1  | N1 <sup>2</sup>  | 87.3(7)   |  | C1   | N1   | Tc1              | 134.4(18)   |
| O2               | Tc1  | N1               | 87.3(7)   |  | C1   | N1   | N2               | 105.2(18)   |
| Cl1 <sup>2</sup> | Tc2  | Cl1 <sup>3</sup> | 170.4(4)  |  | C3   | N2   | N1               | 113(2)      |
| Cl1 <sup>1</sup> | Tc2  | Cl1 <sup>2</sup> | 89.60(3)  |  | C3   | C2   | C1               | 105(2)      |
| Cl1 <sup>1</sup> | Tc2  | Cl1              | 170.4(4)  |  | N1   | C1   | C2               | 110(2)      |
| Cl1              | Tc2  | Cl1 <sup>3</sup> | 89.60(3)  |  | N1   | C1   | C5               | 121(2)      |
| Cl1 <sup>1</sup> | Tc2  | Cl1 <sup>3</sup> | 89.60(3)  |  | C2   | C1   | C5               | 129(3)      |
| Cl1 <sup>2</sup> | Tc2  | Cl1              | 89.60(3)  |  | Tc1  | O2   | Tc2              | 180.0       |

<sup>1</sup>1-X,1-Y,+Z; <sup>2</sup>+Y,1-X,+Z; <sup>3</sup>1-Y,+X,+Z

**Table S10.** Hydrogen Bonds for **3**.

| D  | H   | A                | d(D-H)/Å | d(H-A)/Å | d(D-A)/Å | D-H-A/° |
|----|-----|------------------|----------|----------|----------|---------|
| N2 | H2  | Cl1 <sup>1</sup> | 0.88     | 2.38     | 3.24(2)  | 163.7   |
| C5 | H5A | N1 <sup>1</sup>  | 0.98     | 2.67     | 3.38(4)  | 130.4   |

<sup>1</sup>1-Y,+X,+Z

**Table S11.** Torsion Angles for **3**.

| <b>A</b> | <b>B</b> | <b>C</b> | <b>D</b> | <b>Angle/°</b> |  | <b>A</b> | <b>B</b> | <b>C</b> | <b>D</b> | <b>Angle/°</b> |
|----------|----------|----------|----------|----------------|--|----------|----------|----------|----------|----------------|
| Tc1      | N1       | N2       | C3       | -176.2(17)     |  | C4       | C3       | C2       | C1       | 175(3)         |
| Tc1      | N1       | C1       | C2       | 174.8(17)      |  | N2       | C3       | C2       | C1       | -1(3)          |
| Tc1      | N1       | C1       | C5       | -4(4)          |  | N2       | N1       | C1       | C2       | -1(3)          |
| C3       | C2       | C1       | N1       | 2(3)           |  | N2       | N1       | C1       | C5       | 180(2)         |
| C3       | C2       | C1       | C5       | -180(3)        |  | C2       | C3       | N2       | N1       | 0(3)           |
| C4       | C3       | N2       | N1       | -176(3)        |  | C1       | N1       | N2       | C3       | 1(3)           |

**Table S12.** Bond Lengths for **4**.

| <b>Atom</b> | <b>Atom</b> | <b>Length/Å</b> |  | <b>Atom</b> | <b>Atom</b> | <b>Length/Å</b> |
|-------------|-------------|-----------------|--|-------------|-------------|-----------------|
| Tc1         | Cl1         | 2.371(3)        |  | N9          | C8          | 1.314(14)       |
| Tc1         | Cl2         | 2.450(3)        |  | N1          | C2          | 1.333(13)       |
| Tc1         | O1          | 1.861(8)        |  | N1          | C6          | 1.367(14)       |
| Tc1         | O2          | 1.650(8)        |  | N7          | C12         | 1.351(13)       |
| Tc1         | N1          | 2.132(9)        |  | N7          | C8          | 1.352(13)       |
| Tc1         | N7          | 2.144(9)        |  | C5          | C6          | 1.379(16)       |
| O1          | C13         | 1.429(14)       |  | C5          | C4          | 1.399(16)       |
| N3          | C2          | 1.348(15)       |  | C11         | C10         | 1.377(16)       |
| N3          | C4          | 1.357(15)       |  | C11         | C12         | 1.388(16)       |
| N9          | C10         | 1.350(14)       |  |             |             |                 |

**Table S13.** Bond Angles for **4**.

| <b>Atom</b> | <b>Atom</b> | <b>Atom</b> | <b>Angle/°</b> |  | <b>Atom</b> | <b>Atom</b> | <b>Atom</b> | <b>Angle/°</b> |
|-------------|-------------|-------------|----------------|--|-------------|-------------|-------------|----------------|
| Cl1         | Tc1         | Cl2         | 174.86(10)     |  | C2          | N3          | C4          | 116.3(10)      |
| O1          | Tc1         | Cl1         | 90.7(3)        |  | C8          | N9          | C10         | 115.1(10)      |
| O1          | Tc1         | Cl2         | 84.1(3)        |  | C2          | N1          | Tc1         | 120.3(8)       |
| O1          | Tc1         | N1          | 90.6(3)        |  | C2          | N1          | C6          | 118.3(10)      |
| O1          | Tc1         | N7          | 87.6(3)        |  | C6          | N1          | Tc1         | 121.4(8)       |
| O2          | Tc1         | Cl1         | 97.2(3)        |  | C12         | N7          | Tc1         | 121.6(7)       |
| O2          | Tc1         | Cl2         | 87.9(3)        |  | C12         | N7          | C8          | 116.9(10)      |
| O2          | Tc1         | O1          | 171.0(4)       |  | C8          | N7          | Tc1         | 121.4(7)       |
| O2          | Tc1         | N1          | 93.7(4)        |  | C6          | C5          | C4          | 118.7(11)      |
| O2          | Tc1         | N7          | 88.1(4)        |  | N1          | C2          | N3          | 125.6(10)      |
| N1          | Tc1         | Cl1         | 89.6(3)        |  | C10         | C11         | C12         | 117.3(10)      |
| N1          | Tc1         | Cl2         | 90.5(3)        |  | N9          | C10         | C11         | 123.4(11)      |
| N1          | Tc1         | N7          | 178.2(3)       |  | N7          | C12         | C11         | 120.3(10)      |
| N7          | Tc1         | Cl1         | 90.2(3)        |  | N1          | C6          | C5          | 119.8(10)      |

|     |     |     |          |    |    |    |           |
|-----|-----|-----|----------|----|----|----|-----------|
| N7  | Tc1 | Cl2 | 89.6(3)  | N9 | C8 | N7 | 127.0(11) |
| C13 | O1  | Tc1 | 148.1(7) | N3 | C4 | C5 | 121.3(11) |

**Table S14.** Hydrogen Bonds for **4**.

| D  | H  | A               | d(D-H)/Å | d(H-A)/Å | d(D-A)/Å  | D-H-A/° |
|----|----|-----------------|----------|----------|-----------|---------|
| C2 | H2 | O2 <sup>1</sup> | 0.95     | 2.42     | 3.222(13) | 141.7   |
| C8 | H8 | O1 <sup>2</sup> | 0.95     | 2.51     | 3.323(14) | 143.9   |

<sup>1</sup>1+X,+Y,+Z; <sup>2</sup>-1+X,+Y,+Z

**Table S15.** Torsion Angles for **4**.

| A   | B   | C   | D   | Angle/°    | A   | B   | C   | D   | Angle/°  |
|-----|-----|-----|-----|------------|-----|-----|-----|-----|----------|
| Tc1 | N1  | C2  | N3  | 177.0(9)   | C10 | N9  | C8  | N7  | -0.2(18) |
| Tc1 | N1  | C6  | C5  | -176.6(8)  | C10 | C11 | C12 | N7  | -2.9(18) |
| Tc1 | N7  | C12 | C11 | -177.7(8)  | C12 | N7  | C8  | N9  | -0.5(18) |
| Tc1 | N7  | C8  | N9  | 179.3(10)  | C12 | C11 | C10 | N9  | 2.3(18)  |
| Cl1 | Tc1 | O1  | C13 | -158.7(13) | C6  | N1  | C2  | N3  | 0.1(18)  |
| Cl2 | Tc1 | O1  | C13 | 21.3(13)   | C6  | C5  | C4  | N3  | -1.2(18) |
| N1  | Tc1 | O1  | C13 | 111.7(14)  | C8  | N9  | C10 | C11 | -0.8(18) |
| N7  | Tc1 | O1  | C13 | -68.5(14)  | C8  | N7  | C12 | C11 | 2.0(16)  |
| C2  | N3  | C4  | C5  | 1.5(17)    | C4  | N3  | C2  | N1  | -0.9(18) |
| C2  | N1  | C6  | C5  | 0.2(16)    | C4  | C5  | C6  | N1  | 0.3(17)  |

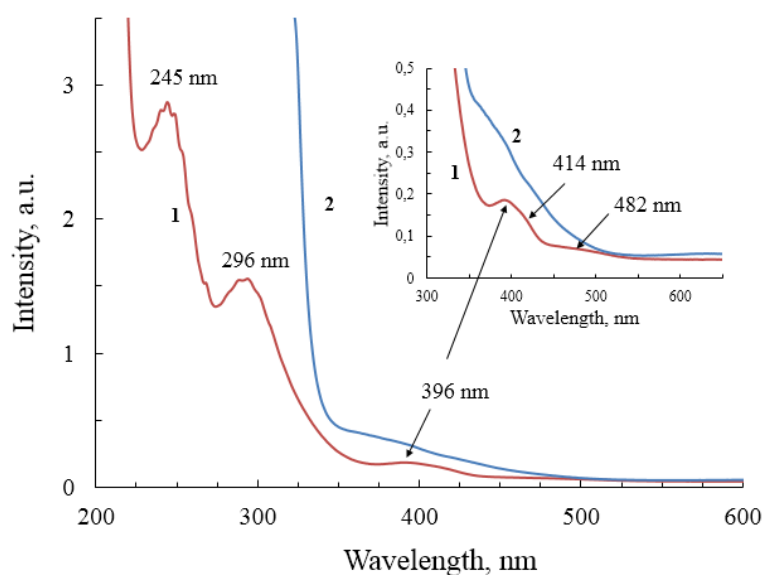

**Figure S1.** Electron absorption spectroscopy of Tc(V) in methanol solution - 1, in acetone solution - 2.

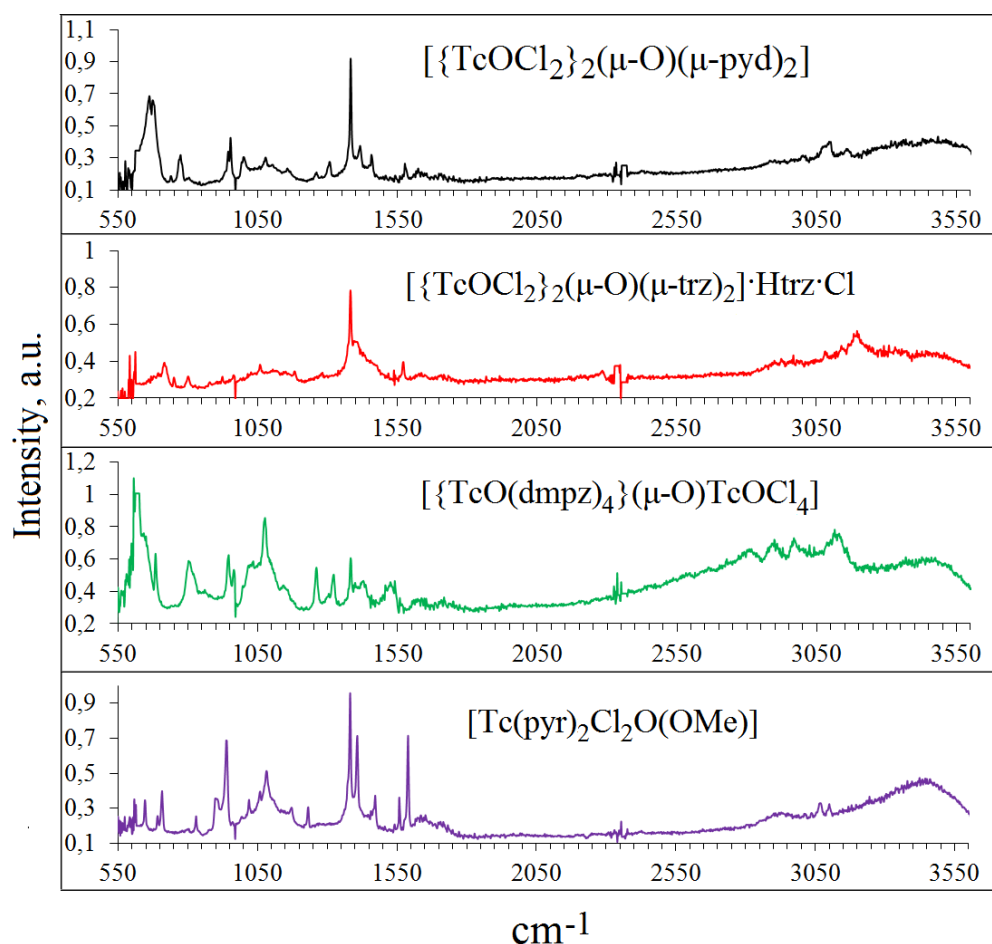

**Figure S2.** IR spectroscopy of complex compounds.

**Table S16.** List of IR peaks.

| Complex 1              |                 | Complex 2              |                 | Complex 3              |                 | Complex 4              |                 |
|------------------------|-----------------|------------------------|-----------------|------------------------|-----------------|------------------------|-----------------|
| Peak, $\text{cm}^{-1}$ | Intensity, a.u. |
| 576                    | 0.27            | 592                    | 0.43            | 606                    | 1.09            | 592                    | 0.25            |
| 622                    | 0.34            | 612                    | 0.45            | 626                    | 1.00            | 608                    | 0.35            |
| 676                    | 0.65            | 722                    | 0.37            | 650                    | 0.74            | 646                    | 0.35            |
| 680                    | 0.62            | 754                    | 0.28            | 684                    | 0.63            | 694                    | 0.23            |
| 736                    | 0.13            | 804                    | 0.39            | 810                    | 0.56            | 708                    | 0.40            |
| 776                    | 0.28            | 926                    | 0.32            | 858                    | 0.39            | 814                    | 0.16            |
| 814                    | 0.15            | 968                    | 0.31            | 944                    | 0.61            | 830                    | 0.25            |
| 936                    | 0.21            | 1062                   | 0.36            | 966                    | 0.52            | 910                    | 0.30            |
| 952                    | 0.42            | 1186                   | 0.32            | 1004                   | 0.43            | 940                    | 0.68            |
| 1006                   | 0.30            | 1286                   | 0.32            | 1014                   | 0.54            | 1006                   | 0.24            |
| 1080                   | 0.29            | 1372                   | 0.78            | 1056                   | 0.58            | 1020                   | 0.33            |
| 1170                   | 0.20            | 1410                   | 0.49            | 1086                   | 0.75            | 1058                   | 0.39            |
| 1266                   | 0.16            | 1486                   | 0.35            | 1100                   | 0.58            | 1087                   | 0.47            |
| 1310                   | 0.25            | 1520                   | 0.31            | 1158                   | 0.40            | 1102                   | 0.35            |



|      |      |      |      |      |      |      |      |
|------|------|------|------|------|------|------|------|
| 1382 | 0.91 | 1538 | 0.35 | 1260 | 0.54 | 1170 | 0.30 |
| 1412 | 0.36 | 1572 | 0.39 | 1320 | 0.49 | 1230 | 0.29 |
| 1460 | 0.29 | 1644 | 0.31 | 1482 | 0.60 | 1382 | 0.97 |
| 1580 | 0.24 | 1720 | 0.31 | 1436 | 0.44 | 1408 | 0.71 |
| 1628 | 0.21 | 2290 | 0.33 | 1456 | 0.37 | 1472 | 0.37 |
| 1698 | 0.29 | 2340 | 0.37 | 1528 | 0.43 | 1554 | 0.21 |
| 2352 | 0.25 | 2928 | 0.40 | 1558 | 0.35 | 1558 | 0.36 |
| 2362 | 0.25 | 2986 | 0.43 | 1644 | 0.32 | 1590 | 0.71 |
| 2878 | 0.27 | 3082 | 0.47 | 1716 | 0.36 | 1640 | 0.23 |
| 3092 | 0.39 | 3140 | 0.48 | 2324 | 0.42 | 1720 | 0.21 |
| -    | -    | 3196 | 0.56 | 2336 | 0.51 | 2328 | 0.17 |
| -    | -    | 3310 | 0.48 | 2350 | 0.45 | 2354 | 0.22 |
| -    | -    | -    | -    | 2826 | 0.64 | 2380 | 0.16 |
| -    | -    | -    | -    | 2908 | 0.69 | 2938 | 0.27 |
| -    | -    | -    | -    | 2968 | 0.72 | 3062 | 0.31 |
| -    | -    | -    | -    | 3114 | 0.78 | 3102 | 0.31 |

**Table S17.** Interpretation of MALDI-ToF peaks.

| m/z              | Possible structure                                                                  | Isotope distribution                                                                 |                                                                                       |
|------------------|-------------------------------------------------------------------------------------|--------------------------------------------------------------------------------------|---------------------------------------------------------------------------------------|
|                  |                                                                                     | experiment                                                                           | theoretical                                                                           |
| Calc.<br>246.95  | 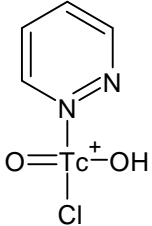 |  |  |
| Found<br>247.047 |                                                                                     |                                                                                      |                                                                                       |
| Calc.<br>281.98  |  |  |  |
| Found<br>282.005 |                                                                                     |                                                                                      |                                                                                       |

|                  |                                                                                     |                                                                                      |                                                                                       |
|------------------|-------------------------------------------------------------------------------------|--------------------------------------------------------------------------------------|---------------------------------------------------------------------------------------|
| Calc.<br>344.97  | 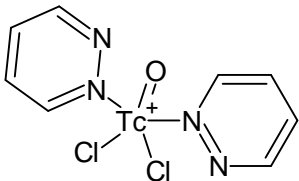   |    |    |
| Found<br>344.994 |                                                                                     |                                                                                      |                                                                                       |
| Calc.<br>361.99  |    |    |    |
| Found<br>362.043 |                                                                                     |                                                                                      |                                                                                       |
| Calc.<br>462.75  |    |    |    |
| Found<br>462.82  |                                                                                     |                                                                                      |                                                                                       |
| Calc.<br>499.777 |   |   |   |
| Found<br>499.784 |                                                                                     |                                                                                      |                                                                                       |
| Calc.<br>536.79  |  |  |  |
| Found<br>536.83  |                                                                                     |                                                                                      |                                                                                       |

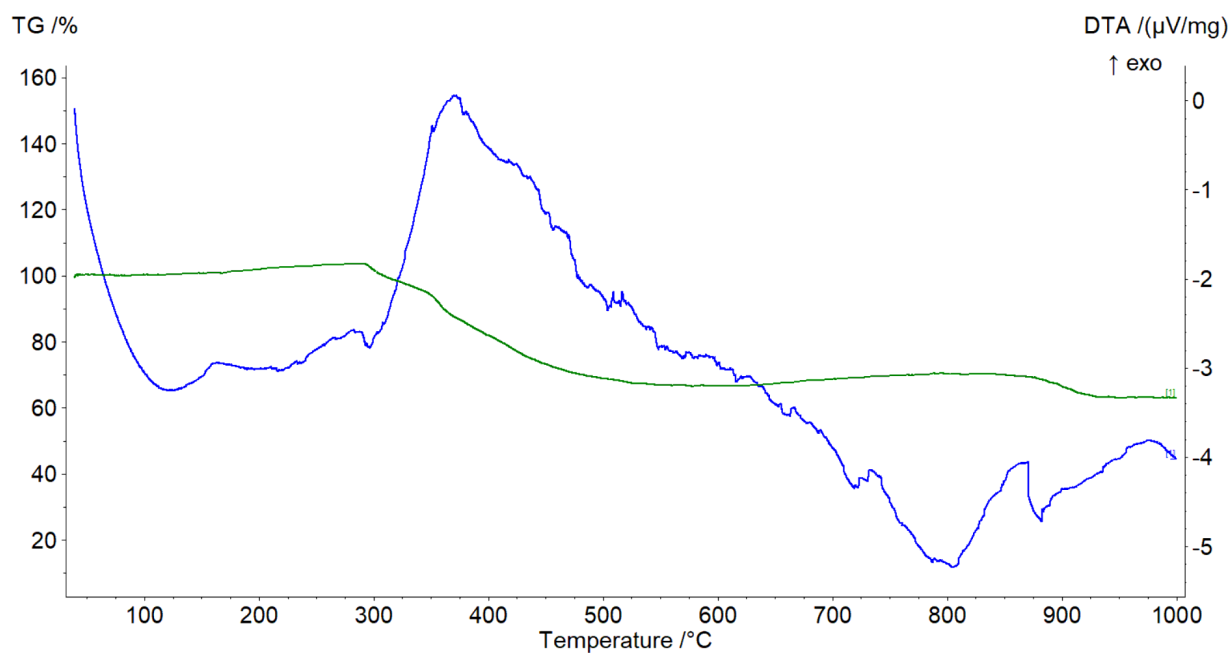

**Figure S3.** TG-DTA of compound 1.

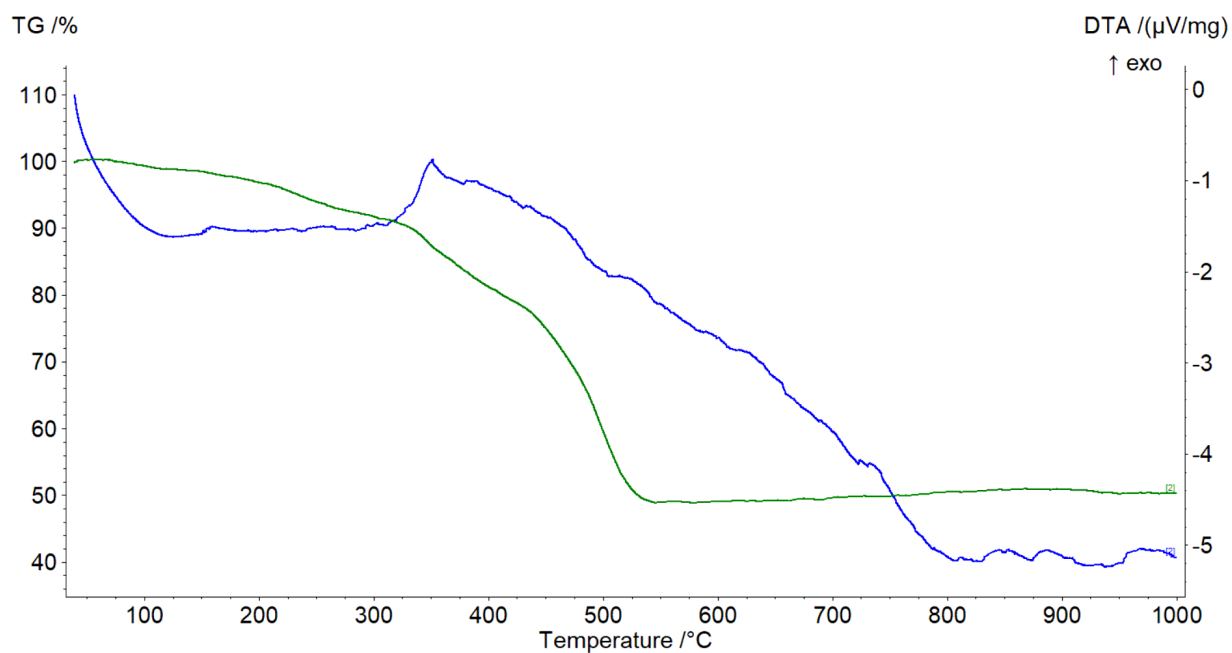

**Figure S4.** TG-DTA of compound 2.
